# Supplementary material
Source: PubMed Central journal article supplement (PMC5980749)
Supplement: NIHMS951860-supplement-Supp_info.pdf [file NIHMS951860-supplement-Supp_info.pdf]

## *Escherichia coli* transcription factor NusG binds to 70S ribosomes

Shivalika Saxena<sup>1</sup>, Kamila K. Myka<sup>1</sup>, Robert Washburn<sup>1</sup>, Nina Constantino<sup>2</sup>, Donald L. Court<sup>2</sup>, and Max E. Gottesman<sup>1\*</sup>

### SUPPLEMENTARY INFORMATION

- Table S1
- Figures S1 and S2
- Supplementary experimental procedures
- Supplementary references

#### SUPPLEMENTARY TABLE

**Table S1: Intermediate strains used for construction**

| Strain   | Genotype                                                                                                          | Construction / Reference                    |
|----------|-------------------------------------------------------------------------------------------------------------------|---------------------------------------------|
| 7006     | N99 <i>nusE71:Tn10 galK<sup>-</sup></i>                                                                           | P1.K2016 x N99                              |
| 10289    | W3110 <i>luc:N cI857 cro(ΔRBS) nutR tRI cII::lacZ:kan nusE100:Tn10</i>                                            | P1.RR229 x NC438                            |
| 11491    | TUC680 <i>nusE71:Tn10</i>                                                                                         | P1.7006 x TUC680                            |
| 12422    | MDS42 <i>rpoB*35</i>                                                                                              | P1.N4849 x RSW712                           |
| K2016    | <i>nusE71 zhb-3082::Tn10</i>                                                                                      | (Schauer <i>et al.</i> , 1996)              |
| N99      | <i>galK2 strA</i>                                                                                                 | (Griffo <i>et al.</i> , 1989)               |
| N4849    | MG1655 <i>rpoB*35</i>                                                                                             | (Trautinger <i>et al.</i> , 2005)           |
| NB885    | W3110 <i>Δ(argF-lac)U169 gal::IS2-490* pglΔ8 rpoC:[His6-kan] nusG F165A</i>                                       | M. Bubunenko, Court lab strain              |
| NC438    | W3110 <i>luc:N cI857 cro(ΔRBS) nutR tR1 cII::lacZ:kan</i>                                                         | N. Constantino, Court lab strain            |
| RR229    | N99 <i>λpR-cro-nutR-tR1-gal nusE100:Tn10</i>                                                                      | R. Robledo, Gottesman lab strain            |
| RSW712   | MDS42 <i>rpoB*35 argE:Tn10</i>                                                                                    | (Washburn and Gottesman, 2011)              |
| SS2132   | TUC680 <i>nusE-M88/D97A:Tn10</i>                                                                                  | ssDNA recombineering into 11491 using pSIM6 |
| TUC680   | W3110 <i>gal::IS2-490* pglΔ8 [lacZ&lt;&gt;cIII-N<sup>+</sup> pL] λcI857 [pR- (cro-bioA)Δ]</i>                     | Court lab strain                            |
| XL2-Blue | <i>endA1 supE44 thi-1 hsdR17 recA1 gyrA96 relA1 lac [F' proAB lacI<sup>q</sup>ZΔM15 Tn10 Amy Cam<sup>R</sup>]</i> | Invitrogen                                  |

**SUPPLEMENTARY FIGURES**

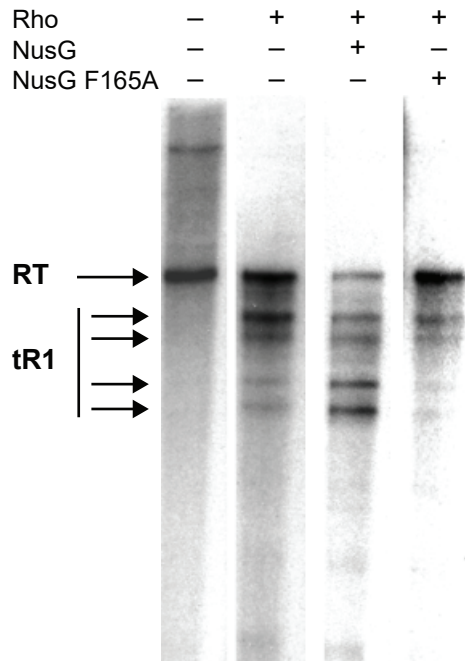

**Figure S1: A representative gel of *in vitro* transcription with NusG and NusG F165A.**

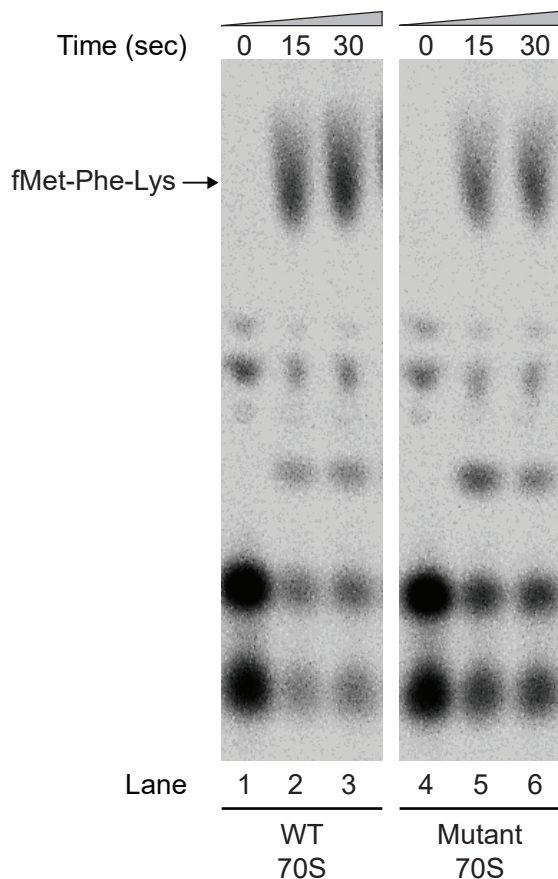

**Figure S2: A representative electrophoretic (eTLC) plate showing formation of fMet-Phe-Lys tripeptide over time with wild-type and mutant ribosomes. Lanes 1, 2 and 3: WT ribosomes, Lanes 4, 5 and 6: mutant ribosomes. The 0, 15 and 30 sec time points represent the interval before the reaction was quenched.**

## SUPPLEMENTARY EXPERIMENTAL PROCEDURES

### *Bacterial strains and plasmid construction*

**Generation of strain 11601 carrying the *nusE* M88A and *nusE* D97A mutations.** Strain TUC680 was P1-transduced with a lysate from strain 7006 (*nusE71:Tn10*) to obtain strain 11491 (Table S1). TUC680 contains a defective  $\lambda$  prophage in which transcription from the  $\lambda pL$  promoter is repressed by *cI857* repressor at 32°C. At 42°C, RNAP transcribing from  $\lambda pL$  is antiterminated by the N-Nus protein complex. This allows transcription to pass through the *gal* leader *IS2* element resulting in *gal* operon expression and a Gal<sup>+</sup> phenotype. The *nusE71* mutation blocks N-Nus antitermination; 11491 is thus Gal<sup>-</sup>. To generate the strain containing the *nusE* M88/D97A mutations, a 72 bp oligonucleotide (5'-TGA TTA ACC CAG GCT GAT CTG CAC CGC TAC ACC GGC AGC CAG ATC CAG ACG CGC CAG CGC ATC AAC GGT TTT-3') was recombineered into 11491 transformed with pSIM6 (Datta *et al.*, 2008). This oligo encodes the antisense sequence of *nusE* gene that corrects the *nusE71* (A86D) sequence and introduces the *nusE* M88/D97A mutations. The (antisense) codons changed are underlined and the wild type alanine (antisense) codon A86 is in bold. The change from *nusE71* to *nusE* M88/97A restores the Nus<sup>+</sup> and Gal<sup>+</sup> phenotypes. Gal<sup>+</sup> recombinants were selected on minimal M63 galactose agar plates supplemented with biotin. The *nusE* M88/D97 mutation was then transduced into MDS42, selecting for tetracycline resistant colonies to yield 11601. All primers were obtained from IDT.

**Construction of strains for the antibiotic sensitivity testing.** Strains KM848, KM850, KM852 and KM854 were constructed as follows. A kanamycin cassette was amplified from a Keio library strain (Baba *et al.*, 2006), digested with XbaI and ligated with pKD3 (Datsenko and Wanner, 2000) also digested with XbaI. The resulting plasmid contained a <kan> cassette instead of a <cat> cassette, in the same orientation. The plasmid was cut with NdeI and ligated with a fragment of *nusG*<sup>+</sup> or *nusG* F165A obtained by PCR from MDS42 and 10780, respectively, using primers *nusG*\_NdeI\_F (5'-GTA TCA CAT ATG GAA GTG GTT GAA ATC CGT-3') and *nusG*\_NdeI\_R (5'-TGT TTG CAT ATG GGG TTA GGC TTT TTC AAC-3'). The resulting two plasmids served as templates for the PCR with primers *nusG*\_recomb\_F (5'-ATT ATG AAC CGC CTG CAG CA-3') and *nusG*\_recomb\_R (5'-CGC CTT GTG CAA CGA TTA AAT CGC CGC TTT TTT GAT CGC TTG TAG GCT GGA GCT GCT TCG-3'). The two PCR products were used for recombineering using pKD46 (Datsenko and Wanner, 2000) into MDS42 and 12422. P1 vir lysates were prepared from the four strains (MDS42 *nusG*<sup>+</sup>/F165A::<kan>; 12422 *nusG*<sup>+</sup>/F165A::<kan>) and used for transduction into MDS42 and 12422, resulting in strains KM848, KM850, KM852 and KM854. The <kan> cassette in all four strains is inserted between the third and fourth nucleotide after the *nusG* stop codon. All PCRs were performed using NEB Q5 High-Fidelity Polymerase.

**Construction of the pTrc-NusG-F165A plasmid.** The ampicillin resistant plasmid pTrc-NusG (pRM431) was a gift from R. Landick (Mooney *et al.*, 2009). Its mutant derivative pTrc-NusG-F165A (pCu2121) was constructed by site-directed mutagenesis using primers 5'-AGT GTC TGT

TTC TAT Cgc CGG TCG TGC GAC CCC G-3' and 5'-AGT GTC TGT TTC TAT Ccg CGG TCG TGC GAC CCC G-3' to amplify *nusE*. PCR was performed using Pfu TURBO DNA Polymerase from Stratagene. XL-2 blue cells from Invitrogen were used to select ampicillin-resistant transformants of pTrc-NusG-F165A. p-Trc-NusG-F165A transformants were lethal when overexpressed by addition of IPTG on LB-Amp agar and were sensitive to 4  $\mu\text{g ml}^{-1}$  of chloramphenicol on LB-Amp-Cm plates at 37°C.

### ***In vitro transcription***

Transcription templates were generated using GoTaq DNA polymerase (Promega, Madison, WI) and primers 5'-GTT AAA TCT ATC ACC GCA AGG GAT-3' and 5'-CGT AGA GCC TCG TTG CGT-3'. These oligos amplify a 500 bp fragment of phage  $\lambda$  including the  $\lambda$  *pR* promoter and the Rho-dependent terminator tR1. Open complexes were formed by preincubating 0.1 pmol template with 2 pmol RNAP (New England Biolabs, Ipswich, MA) and 40 units rRNasin Plus (Promega, Madison, WI) in 50  $\mu\text{l}$  transcription buffer (20 mM Tris-acetate (pH 7.9), 60 mM potassium acetate, 4 mM magnesium acetate, 1 mM DTT, 0.25 mg  $\text{ml}^{-1}$  bovine serum albumin, and 5% (v/v) glycerol) for 5 min at 37°C. Where indicated, 2 pmol Rho and/or 2 pmol NusG or 2 pmol NusG F165A were added. Transcription was initiated by addition of 200  $\mu\text{M}$  GTP, CTP and ATP and 50  $\mu\text{M}$  UTP plus 1  $\mu\text{Ci}$  of [ $\alpha$ - $^{32}\text{P}$ ] ATP. After 10 min. the reactions were terminated by addition of 50  $\mu\text{l}$  stop mix (375 mM sodium acetate (pH 5.2), 62.5 mM EDTA) and precipitated with 3 volumes 95% (v/v) ethanol. Extracted RNA was then resolved on a denaturing polyacrylamide gel (7 M urea) and analyzed by autoradiography.

### ***In vitro translation and eTLC***

The individual components required for this assay were purified and obtained from R. Gonzalez (Columbia University). For more detail, see supplementary material for Ning *et al.* (2014) and Fei *et al.* (2010). The pre-initiation complex consisted of 3  $\mu\text{M}$  ribosomes (WT or mutant), 110  $\mu\text{M}$  IF1, 99  $\mu\text{M}$  IF2, 206  $\mu\text{M}$  IF3, 50 mM GTP, 5x initiation polymix in a final volume of 1.54  $\mu\text{l}$ . Tubes were kept at 37°C for 10 min and then shifted to RT. The above complex was mixed with 110  $\mu\text{M}$  of mRNA (Met, Phe, and Lys) and 28.5  $\mu\text{M}$  of  $\text{S}^{35}$  labeled fMet-tRNA in a final volume of 2.25  $\mu\text{l}$  to enable 70S complex formation. The reaction was kept at 37°C for 20 min and then transferred on ice. The final reaction was set up with 0.5  $\mu\text{l}$  of 70S complex, 1  $\mu\text{l}$  of solution 5 and 1  $\mu\text{l}$  of solution 4 (Fei *et al.*, 2010). The reaction was run at 37°C for 0, 15, 30, 60 and 300 sec and then quenched with the addition of 1  $\mu\text{l}$  KOH. Samples were stored at -80°C until the eTLC separation. 2-5  $\mu\text{l}$  of sample was mixed with dye and spotted on a TLC plate (aluminum cellulose plate, 1055520001, EMD Millipore) and run at 1200 V for 30 min. Signals were read using a phosphorimager screen.

## SUPPLEMENTARY REFERENCES

Baba, T., Ara, T., Hasegawa, M., Takai, Y., Okumura, Y., Baba, M., Datsenko, K.A., Tomita, M., Wanner, B.L. and Mori, H., (2006) Construction of *Escherichia coli* K-12 in-frame, single-gene knockout mutants: the Keio collection. *Mol Syst Biol* **2**: 2006 0008.

Datsenko, K.A. and Wanner, B.L., (2000) One-step inactivation of chromosomal genes in *Escherichia coli* K-12 using PCR products. *Proc Natl Acad Sci U S A* **97**: 6640-6645.

Datta, S., Costantino, N., Zhou, X. and Court, D.L., (2008) Identification and analysis of recombineering functions from Gram-negative and Gram-positive bacteria and their phages. *Proc Natl Acad Sci U S A* **105**: 1626-1631.

Fei, J., Wang, J., Sternberg, S.H., MacDougall, D.D., Elvekrog, M.M., Pulkunat, D.K., Englander, M.T. and Gonzalez, R.L., Jr., (2010) A highly purified, fluorescently labeled *in vitro* translation system for single-molecule studies of protein synthesis. *Methods Enzymol* **472**: 221-259.

Griffo, G., Oppenheim, A.B. and Gottesman, M.E., (1989) Repression of the lambda pcin promoter by integrative host factor. *J Mol Biol* **209**: 55-64.

Mooney, R.A., Schweimer, K., Rosch, P., Gottesman, M. and Landick, R., (2009) Two structurally independent domains of *E. coli* NusG create regulatory plasticity via distinct interactions with RNA polymerase and regulators. *J Mol Biol* **391**: 341-358.

Ning, W., Fei, J. and Gonzalez, R.L., Jr., (2014) The ribosome uses cooperative conformational changes to maximize and regulate the efficiency of translation. *Proc Natl Acad Sci U S A* **111**: 12073-12078.

Schauer, A.T., Cheng, S.W., Zheng, C., St Pierre, L., Alessi, D., Hidayetoglu, D.L., Costantino, N., Court, D.L. and Friedman, D.I., (1996) The alpha subunit of RNA polymerase and transcription antitermination. *Mol Microbiol* **21**: 839-851.

Trautinger, B.W., Jaktaji, R.P., Rusakova, E. and Lloyd, R.G., (2005) RNA polymerase modulators and DNA repair activities resolve conflicts between DNA replication and transcription. *Mol Cell* **19**: 247-258.

Washburn, R.S. and Gottesman, M.E., (2011) Transcription termination maintains chromosome integrity. *Proc Natl Acad Sci U S A* **108**: 792-797.
